# Supplementary material for: Discrimination Efficiency of Thermogravimetry and Differential Scanning Calorimetry in Soil Forensics
Source: MDPI journal article supplement (doi:10.3390/forensicsci4010007), 2024-03-02
Supplement: s1 [file s1]

# Discrimination efficiency of thermogravimetry and differential scanning calorimetry in soil forensics

Rodrigo Studart Corrêa <sup>1</sup>, Renata Esteves Ribeiro <sup>2</sup>, Marina Pereira Borges <sup>3</sup>, Ettore Ferrari únior <sup>1</sup>, and Juliano de Andrade Gomes <sup>1,\*</sup>

<sup>1</sup> Forensic Institute, Civil Police of the Brazilian Federal District (PCDF), Brasília City, DF, 70610907, Brazil; rodmanga@yahoo.com.br (R.S.C.); ettoreferrarijr@gmail.com (E.F.J.)

<sup>2</sup> Postgraduate Program in Environmental Sciences, University of Brasília (PPGCA/FUP/UnB), Brasília City, DF, 73300000 Brazil; renataeribeiro@gmail.com

<sup>3</sup> Department of Pharmacy, University of Brasília (FAR/FS/UnB), Brasília City, DF, 70910900, Brazil; nina.p.borges@gmail.com.

\* Correspondence: perito.juliano@gmail.com; Tel.: +55-61-99278-3020.

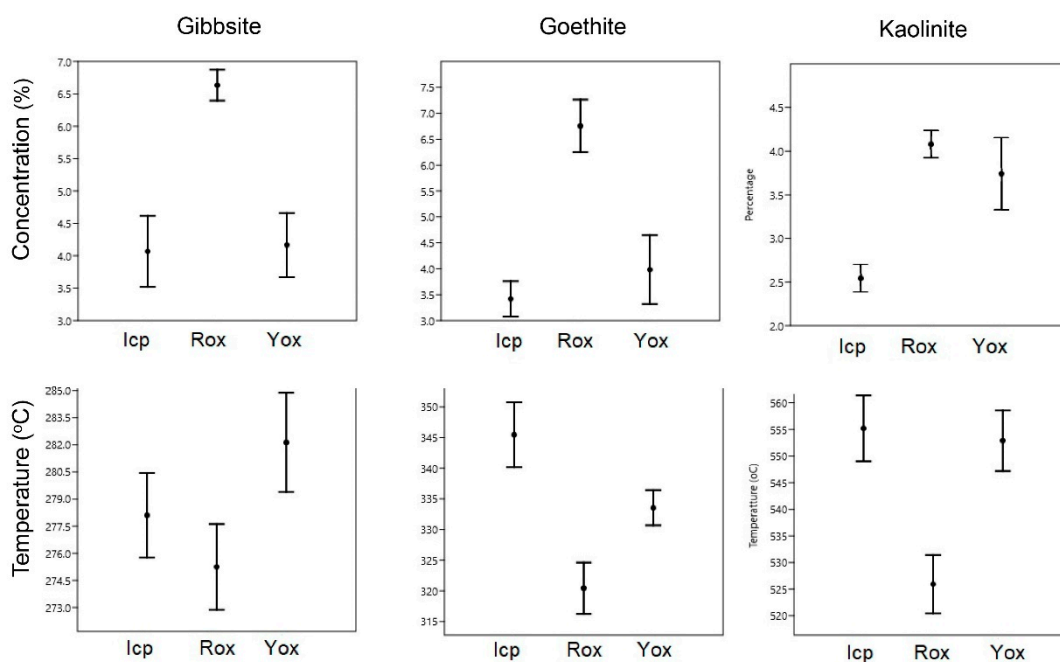

**Figure S1.** Means (dots) and standard deviations (bars) of Gibbsite, Goethite, Kaolinite, and respective decomposition temperatures of these minerals in Inceptisol (Icp), Reddish Oxisol (Rox), and Yellowish Oxisol (Yox) submitted to thermal analysis.

**Table S1.** Principal Component Analysis (PCA), Non-metric Multidimensional Scale (NMDS), and Cluster data for selected samples, illustrating the discrimination efficiency (DE) of thermogravimetry (TG) technique.

| Test/Sample                    | Sample at wrong position | Discrimination efficiency (DE) |
|--------------------------------|--------------------------|--------------------------------|
| <b>PCA - variance</b>          |                          |                                |
| Icp-4, Yox-8, Rox-8            | Yox-8c                   | 88.9%                          |
| Icp-8, Yox-7, Rox-10           |                          | 100%                           |
| Icp-9, Yox-9, Rox-5            |                          | 100%                           |
| Icp-6, Yox-6, Rox-7            |                          | 100%                           |
| Icp-7, Yox-4, Rox-3            |                          | 100%                           |
| Icp-10, Yox-1, Rox-2           |                          | 100%                           |
| Icp-5, Yox-5, Rox-9            | Icp-5c                   | 88.9%                          |
| Icp-3, Yox3, Rox-6             | Yox-3a,b,c               | 66.7%                          |
| Icp-2, Yox-10, Rox-1           |                          | 100%                           |
| Icp-1, Yox-2, Rox-4            |                          | 100%                           |
| <b>NMDS - Euclidean</b>        |                          |                                |
| Icp-4, Yox-8, Rox-8            | Yox-8c                   | 88.9%                          |
| Icp-8, Yox-7, Rox-10           |                          | 100%                           |
| Icp-9, Yox-9, Rox-5            |                          | 100%                           |
| Icp-6, Yox-6, Rox-7            |                          | 100%                           |
| Icp-7, Yox-4, Rox-3            |                          | 100%                           |
| Icp-10, Yox-1, Rox-2           |                          | 100%                           |
| Icp-5, Yox-5, Rox-9            | Icp-5c                   | 88.9%                          |
| Icp-3, Yox3, Rox-6             | Yox-3a                   | 88.9%                          |
| Icp-2, Yox-10, Rox-1           |                          | 100%                           |
| Icp-1, Yox-2, Rox-4            |                          | 100%                           |
| <b>Cluster UPGMA - K-means</b> |                          |                                |
| Icp-4, Yox-8, Rox-8            |                          | 100%                           |
| Icp-8, Yox-7, Rox-10           |                          | 100%                           |
| Icp-9, Yox-9, Rox-5            | Yox-9c                   | 88.9%                          |
| Icp-6, Yox-6, Rox-7            |                          | 100%                           |
| Icp-7, Yox-4, Rox-3            |                          | 100%                           |
| Icp-10, Yox-1, Rox-2           |                          | 100%                           |
| Icp-5, Yox-5, Rox-9            |                          | 100%                           |
| Icp-3, Yox3, Rox-6             |                          | 100%                           |
| Icp-2, Yox-10, Rox-1           |                          | 100%                           |
| Icp-1, Yox-2, Rox-4            |                          | 100%                           |
| <b>PCA - variance</b>          |                          |                                |
| Icp-2, Yox-10, Rox-1           |                          | 100%                           |
| Icp-8, Yox-1, Rox-5            |                          | 100%                           |
| Icp-10, Yox-8, Rox-2           |                          | 100%                           |
| Icp-9, Yox-2, Rox-7            |                          | 100%                           |
| Icp-6, Yox-5, Rox-3            |                          | 100%                           |
| Icp-4, Yox-3, Rox-6            | Yox-3a,b,c               | 66.7%                          |
| Icp-3, Yox-4, Rox-9            |                          | 100%                           |
| Icp-7, Yox-6, Rox-8            |                          | 100%                           |
| Icp-1, Yox-7, Rox-10           |                          | 100%                           |
| Icp-5, Yox-9, Rox-4            | Icp-5c, Yox-9c           | 77.8%                          |
| <b>NMDS - Euclidean</b>        |                          |                                |
| Icp-2, Yox-10, Rox-1           |                          | 100%                           |
| Icp-8, Yox-1, Rox-5            |                          | 100%                           |
| Icp-10, Yox-8, Rox-2           | Yox-8a                   | 88.9%                          |
| Icp-9, Yox-2, Rox-7            |                          | 100%                           |
| Icp-6, Yox-5, Rox-3            |                          | 100%                           |
| Icp-4, Yox-3, Rox-6            | Yox-3a,b,c               | 66.7%                          |
| Icp-3, Yox-4, Rox-9            |                          | 100%                           |
| Icp-7, Yox-6, Rox-8            |                          | 100%                           |

|                                                                |                                |       |
|----------------------------------------------------------------|--------------------------------|-------|
| Icp-1, Yox-7, Rox-10                                           |                                | 100%  |
| Icp-5, Yox-9, Rox-4                                            | Icp-5c, Yox-9c                 | 77.8% |
| <b>Cluster UPGMA - K-means</b>                                 |                                | 100%  |
| Icp-2, Yox-10, Rox-1                                           |                                | 100%  |
| Icp-8, Yox-1, Rox-5                                            |                                | 100%  |
| Icp-10, Yox-8, Rox-2                                           | Yox-8b                         | 88.9% |
| Icp-9, Yox-2, Rox-7                                            |                                | 100%  |
| Icp-6, Yox-5, Rox-3                                            |                                | 100%  |
| Icp-4, Yox-3, Rox-6                                            | Yox-3b                         | 88.9% |
| Icp-3, Yox-4, Rox-9                                            |                                | 100%  |
| Icp-7, Yox-6, Rox-8                                            |                                | 100%  |
| Icp-1, Yox-7, Rox-10                                           |                                | 100%  |
| Icp-5, Yox-9, Rox-4                                            |                                | 100%  |
| PCA - variance                                                 |                                |       |
| Yox-3, Yox-8, Yox-9                                            | Yox-3a, Yox-9c                 | 77.8% |
| Icp-5, Yox-3, Yox-8, Yox-9                                     | Icp-5c, Yox-3a, Yox-9c         | 66.7% |
| <b>NMDS - Euclidean</b>                                        |                                |       |
| Yox-3, Yox-8, Yox-9                                            | Yox-3a, Yox-9c                 | 77.8% |
| Icp-5, Yox-3, Yox-8, Yox-9                                     | Icp-5c, Yox-3a, Yox-8c, Yox-9c | 66.7% |
| <b>Cluster UPGMA - K-means</b>                                 |                                |       |
| Yox-3, Yox-8, Yox-9                                            | Yox-9c                         | 88.9% |
| Icp-5, Yox-3, Yox-8, Yox-9                                     | Icp-5c, Yox-3a, Yox-9c         | 66.7% |
| <b>PCA - variance</b>                                          |                                |       |
| Icp-6, Icp-9, Yox-7, Yox-9, Rox-9, Rox-6                       | Yox-9c                         | 94.4% |
| Icp-4, Icp-5, Yox-4, Yox-5, Rox-1, Rox-8                       | Icp-5c                         | 94.4% |
| Icp-1, Icp-8, Yox-3, Yox-6, Rox-3, Rox-10                      | Yox-3a,b,c                     | 83.3% |
| Icp-7, Icp-10, Yox-1, Yox-8, Rox-2, Rox-5                      |                                | 100%  |
| Icp-2, Icp-3, Yox-2, Yox-10, Rox-4, Rox-7                      | Yox-2c                         | 94.4% |
| <b>NMDS - Euclidean</b>                                        |                                |       |
| Icp-6, Icp-9, Yox-7, Yox-9, Rox-9, Rox-6                       | Yox-9c                         | 94.4% |
| Icp-4, Icp-5, Yox-4, Yox-5, Rox-1, Rox-8                       | Icp-5c                         | 94.4% |
| Icp-1, Icp-8, Yox-3, Yox-6, Rox-3, Rox-10                      | Yox-3a,b,c                     | 83.3% |
| Icp-7, Icp-10, Yox-1, Yox-8, Rox-2, Rox-5                      |                                | 100%  |
| Icp-2, Icp-3, Yox-2, Yox-10, Rox-4, Rox-7                      |                                | 100%  |
| <b>Cluster UPGMA - K-means</b>                                 |                                |       |
| Icp-6, Icp-9, Yox-7, Yox-9, Rox-9, Rox-6                       |                                | 100%  |
| Icp-4, Icp-5, Yox-4, Yox-5, Rox-1, Rox-8                       | Icp-5c                         | 94.4% |
| Icp-1, Icp-8, Yox-3, Yox-6, Rox-3, Rox-10                      | Yox-3a, Yox-6a                 | 88.9% |
| Icp-7, Icp-10, Yox-1, Yox-8, Rox-2, Rox-5                      | Icp-7b                         | 94.4% |
| Icp-2, Icp-3, Yox-2, Yox-10, Rox-4, Rox-7                      | Yox-10a                        | 94.4% |
| <b>PCA - variance</b>                                          |                                |       |
| Icp-2, Icp-7, Icp-9, Yox-1, Yox-6, Yox-10, Rox-1, Rox-3, Rox-8 | Icp-7b, Icp-9c, Yox-6a, Rox-3a | 85.2% |

|                                                                 |                                                                                                                                          |       |
|-----------------------------------------------------------------|------------------------------------------------------------------------------------------------------------------------------------------|-------|
| Icp-4, Icp-8, Icp-10, Yox-2, Yox-8, Yox-9, Rox-9, Rox-7, Rox-10 | Yox-9c, Rox-9c, Rox-7b                                                                                                                   | 88.9% |
| Icp-1, Icp-3, Icp-6, Yox-4, Yox-5, Yox-7, Rox-2, Rox-4, Rox-6   | Icp-3b, Rox-2a, Rox-6c                                                                                                                   | 88.9% |
| <b>NMDS - Euclidean</b>                                         |                                                                                                                                          |       |
| Icp-2, Icp-7, Icp-9, Yox-1, Yox-6, Yox-10, Rox-1, Rox-3, Rox-8  | Icp-7b, C-25-c, LA-22a, LE-3a                                                                                                            | 85.2% |
| Icp-4, Icp-8, Icp-10, Yox-2, Yox-8, Yox-9, Rox-9, Rox-7, Rox-10 | Icp-10a,b,c, Yox-9c, Rox-9c                                                                                                              | 81.5% |
| Icp-1, Icp-3, Icp-6, Yox-4, Yox-5, Yox-7, Rox-2, Rox-4, Rox-6   | Rox-6a,b                                                                                                                                 | 92.6% |
| <b>Cluster UPGMA - K-means</b>                                  |                                                                                                                                          |       |
| Icp-2, Icp-7, Icp-9, Yox-1, Yox-6, Yox-10, Rox-1, Rox-3, Rox-8  | Icp-7a,b,c                                                                                                                               | 88.9% |
| Icp-4, Icp-8, Icp-10, Yox-2, Yox-8, Yox-9, Rox-9, Rox-7, Rox-10 | Rox-7a,b,c, Rox-10b                                                                                                                      | 85.2% |
| Icp-1, Icp-3, Icp-6, Yox-4, Yox-5, Yox-7, Rox-2, Rox-4, Rox-6   | Rox-6a,b,c                                                                                                                               | 88.9% |
| <b>PCA - variance</b>                                           |                                                                                                                                          |       |
| All the samples                                                 | Icp-3b, Icp-4a, Icp-5c, Icp-7b, Icp-8c, Icp-9c, Icp-10b, Rox-3a, Rox-5c, Rox-6c, Rox-7a, Yox-3a, Yox-4c, Yox-5b, Yox-6a, Yox-8a,c Yox-9c | 80.0% |
| <b>NMDS - Euclidean</b>                                         |                                                                                                                                          |       |
| All the samples                                                 | Icp-5c, Icp-7b, Icp-10b, Rox-1c, Rox-3a, Rox-5c, Rox-6c Yox-3a,b,c, Yox-1b, Yox-7a, Yox-9c,                                              | 85.6% |
| <b>Cluster UPGMA - K-means</b>                                  |                                                                                                                                          |       |
| All the samples                                                 | Icp-5c, Icp-9c, Icp-10a,b,c, Yox-3a, Yox-5b, Yox-10a, Rox-2a, Rox-3a, Rox-9c, Rox-7b, Rox-10c,                                           | 85.6% |

**Table S2.** Principal Component Analysis (PCA), Non-metric Multidimensional Scale (NMDS), and Cluster data for selected samples, illustrating the discrimination efficiency (DE) of thermogravimetry (TG) and differential scanning calorimetry (DSC) techniques.

| Test/Sample             | Sample at wrong position | TG Discrimination efficiency (DE) | DSC Discrimination efficiency (DE) | TG + DSC Discrimination efficiency (DE) |
|-------------------------|--------------------------|-----------------------------------|------------------------------------|-----------------------------------------|
| <b>PCA - variance</b>   |                          |                                   |                                    |                                         |
| Icp-6, Yox-9, Rox-3     | Yox-9c                   | 88.9%                             | 0.0%                               | 22.2%                                   |
| Icp-1, Yox-3, Rox-2     |                          | 100%                              | 77.8%                              | 100%                                    |
| Icp-9, Yox-6, Rox-10    | Icp-9c                   | 88.9%                             | 22.2%                              | 22.2%                                   |
| Icp-2, Yox-8, Rox-7     |                          | 100%                              | 100%                               | 100%                                    |
| Icp-3, Yox-2, Rox-4     | Yox-2b                   | 100%                              | 88.9%                              | 88.9%                                   |
| Icp-10, Yox-4, Rox-1    | Rox-1c                   | 88.9%                             | 88.9%                              | 88.9%                                   |
| Icp-8, Yox-5, Rox-6     | Yox-5c, Rox-6c           | 77.8%                             | 55.6%                              | 66.7%                                   |
| Icp-7, Yox-10, Rox-5    | Yox-10a, Rox-5c          | 77.8%                             | 22.2%                              | 33.3%                                   |
| Icp-5, Yox-1, Rox-9     |                          | 100%                              | 22.2%                              | 66.7%                                   |
| Icp-4, Yox-7, Rox-8     | Yox-7b                   | 88.9%                             | 66.7%                              | 66.7%                                   |
| <b>NMDS - Euclidean</b> |                          |                                   |                                    |                                         |
| Icp-6, Yox-9, Rox-3     | Yox-9c                   | 88.9%                             | 0.0%                               | 22.2%                                   |
| Icp-1, Yox-3, Rox-2     |                          | 100%                              | 77.8%                              | 44.4%                                   |
| Icp-9, Yox-6, Rox-10    | Icp-9c                   | 88.9%                             | 22.2%                              | 22.2%                                   |
| Icp-2, Yox-8, Rox-7     |                          | 100%                              | 100%                               | 100%                                    |
| Icp-3, Yox-2, Rox-4     |                          | 100%                              | 88.9%                              | 88.9%                                   |

|                                                                 |                                                         |       |       |       |
|-----------------------------------------------------------------|---------------------------------------------------------|-------|-------|-------|
| Icp-10, Yox-4, Rox-1                                            | Rox-1c                                                  | 88.9% | 88.9% | 88.9% |
| Icp-8, Yox-5, Rox-6                                             | Yox-5c, Rox-6c                                          | 77.8% | 55.6% | 77.8% |
| Icp-7, Yox-10, Rox-5                                            | Yox-10a, Rox-5c                                         | 77.8% | 55.6% | 77.8% |
| Icp-5, Yox-1, Rox-9                                             | Icp-5c                                                  | 88.9% | 33.3% | 66.7% |
| Icp-4, Yox-7, Rox-8                                             |                                                         | 100%  | 66.7% | 66.7% |
| <b>Cluster UPGMA - K-means</b>                                  |                                                         |       |       |       |
| Icp-6, Yox-9, Rox-3                                             |                                                         | 100%  | 66.7% | 44.4% |
| Icp-1, Yox-3, Rox-2                                             |                                                         | 100%  | 55.6% | 55.6% |
| Icp-9, Yox-6, Rox-10                                            |                                                         | 77.8% | 88.9% | 77.8% |
| Icp-2, Yox-8, Rox-7                                             |                                                         | 100%  | 100%  | 100%  |
| Icp-3, Yox-2, Rox-4                                             |                                                         | 77.8% | 88.9% | 88.9% |
| Icp-10, Yox-4, Rox-1                                            |                                                         | 100%  | 66.7% | 100%  |
| Icp-8, Yox-5, Rox-6                                             |                                                         | 77.8% | 55.6% | 66.7% |
| Icp-7, Yox-10, Rox-5                                            |                                                         | 100%  | 55.6% | 100%  |
| Icp-5, Yox-1, Rox-9                                             |                                                         | 55.6% | 77.7% | 88.9% |
| Icp-4, Yox-7, Rox-8                                             |                                                         | 100%  | 55.6% | 55.5% |
| <b>PCA - variance</b>                                           |                                                         |       |       |       |
| Icp-6, Icp-7, Yox-3, Yox-7, Rox-5, Rox-10                       | Icp-7b                                                  | 94.4% | 77.8% | 94.4% |
| Icp-2, Icp-8, Yox-1, Yox-4, Rox-1, Rox-9                        | Rox-1c                                                  | 94.4% | 94.4% | 100%  |
| Icp-1, Icp-9, Yox-7, Yox-9, Rox-2, Rox-8                        | Icp-9c, Yox-9c, Rox-2a                                  | 83.3% | 11.1% | 38.9% |
| Icp-4, Icp-10, Yox-6, Yox-8, Rox-3, Rox-6                       | Icp-10b, Yox-6a                                         | 88.9% | 0.0%  | 16.7% |
| Icp-3, Icp-5, Yox-2, Yox-10, Rox-4, Rox-7                       |                                                         | 100%  | 0.0%  | 11.1% |
| <b>NMDS - Euclidean</b>                                         |                                                         |       |       |       |
| Icp-6, Icp-7, Yox-3, Yox-7, Rox-5, Rox-10                       | Icp-6a                                                  | 94.4% | 77.8% | 88.9% |
| Icp-2, Icp-8, Yox-1, Yox-4, Rox-1, Rox-9                        |                                                         | 94.4% | 83.3% | 94.4% |
| Icp-1, Icp-9, Yox-7, Yox-9, Rox-2, Rox-8                        | Rox-2a                                                  | 94.4% | 27.8% | 38.9% |
| Icp-4, Icp-10, Yox-6, Yox-8, Rox-2, Rox-6                       |                                                         | 77.8% | 0.0%  | 16.7% |
| Icp-3, Icp-5, Yox-2, Yox-10, Rox-4, Rox-7                       |                                                         | 100%  | 0.0%  | 0.0%  |
| <b>Cluster UPGMA - K-means</b>                                  |                                                         |       |       |       |
| Icp-6, Icp-7, Yox-3, Yox-7, Rox-5, Rox-10                       | Rox-5c, Yox-7c                                          | 88.9% | 88.9% | 88.9% |
| Icp-2, Icp-8, Yox-1, Yox-4, Rox-1, Rox-9                        |                                                         | 94.4% | 83.3% | 88.9% |
| Icp-1, Icp-9, Yox-7, Yox-9, Rox-2, Rox-8                        | Icp-1b, Yox-9c,                                         | 88.9% | 83.3% | 83.3% |
| Icp-4, Icp-10, Yox-6, Yox-8, Rox-2, Rox-6                       |                                                         | 83.3% | 50.0% | 66.7% |
| Icp-3, Icp-5, Yox-2, Yox-10, Rox-4, Rox-7                       | Yox-2c, Yox-10a                                         | 88.9% | 55.6% | 50%   |
| <b>PCA - variance</b>                                           |                                                         |       |       |       |
| Icp-3, Icp-4, Icp-7, Yox-4, Yox-6, Yox-7, Rox-2, Rox-5, Rox-8   | Icp-3b, Icp-7b, Yox-6a, Yox-4c, Yox-7b, Rox-2a, Rox-5c, | 74.1% | 11.1% | 11.1% |
| Icp-2, Icp-5, Icp-10, Yox-2, Yox-8, Yox-10, Rox-4, Rox-6, Rox-9 | Icp-10b, Rox-6c, Rox9c                                  | 88.9% | 11.1% | 11.1% |

|                                                                                                          |                |       |       |       |
|----------------------------------------------------------------------------------------------------------|----------------|-------|-------|-------|
| Icp-1, Icp-6, Icp-8, Yox-3, Yox-5, Yox-9, Rox-1, Rox-3, Rox-10                                           | Yox-5c, Rox-1c | 92.6% | 0.0%  | 0.0%  |
| <b>NMDS - Euclidean</b>                                                                                  |                |       |       |       |
| Icp-3, Icp-4, Icp-10, Yox-4, Yox-6, Yox-7, Rox-2, Rox-5, Rox-8                                           |                | 74.1% | 11.1% | 33.3% |
| Icp-2, Icp-5, Icp-7, Yox-2, Yox-8, Yox-10, Rox-4, Rox-6, Rox-9                                           |                | 96.3% | 11.1% | 22.2% |
| Icp-1, Icp-6, Icp-8, Yox-3, Yox-5, Yox-9, Rox-1, Rox-3, Rox-10                                           |                | 33.3% | 22.2% | 22.2% |
| <b>Cluster UPGMA - K-means</b>                                                                           |                |       |       |       |
| Icp-3, Icp-4, Icp-10, Yox-4, Yox-6, Yox-7, Rox-2, Rox-5, Rox-8                                           |                | 88.9% | 85.2% | 85.2% |
| Icp-2, Icp-5, Icp-7, Yox-2, Yox-8, Yox-10, Rox-4, Rox-6, Rox-9                                           |                | 92.6% | 77.8% | 74.1% |
| Icp-1, Icp-6, Icp-8, Yox-3, Yox-5, Yox-9, Rox-1, Rox-3, Rox-10                                           |                | 88.9% | 63.0% | 74.1% |
| <b>PCA - variance</b>                                                                                    |                |       |       |       |
| Icp-1, Icp-3, Icp-6, Icp-5 Yox-1, Yox-4, Yox-7, Yox-8, Rox-2, Rox-3, Rox-5, Rox-9                        |                | 33.3% | 0.0%  | 0.0%  |
| Icp-2, Icp-4, Icp-7, Icp-10, Yox-3, Yox-5, Yox-6, Yox-9, Rox-4, Rox-6, Rox-8, Rox-10                     |                | 41.7% | 0.0%  | 0.0%  |
| <b>NMDS - Euclidean</b>                                                                                  |                |       |       |       |
| Icp-1, Icp-3, Icp-5, Icp-6 Yox-1, Yox-4, Yox-7, Yox-8, Rox-2, Rox-3, Rox-5, Rox-9                        |                | 25.0% | 0.0%  | 0.0%  |
| Icp-2, Icp-4, Icp-7, Icp-10, Yox-3, Yox-5, Yox-6, Yox-9, Rox-4, Rox-6, Rox-8, Rox-10                     |                | 41.7% | 0.0%  | 0.0%  |
| <b>Cluster UPGMA - K-means</b>                                                                           |                |       |       |       |
| Icp-1, Icp-3, Icp-6, Icp-5 Yox-1, Yox-4, Yox-7, Yox-8, Rox-2, Rox-3, Rox-5, Rox-9                        |                | 94.4% | 69.4% | 80.6% |
| Icp-2, Icp-4, Icp-7, Icp-10, Yox-3, Yox-5, Yox-6, Yox-9, Rox-4, Rox-6, Rox-8, Rox-10                     |                | 97.2% | 75.0% | 83.3% |
| <b>PCA - variance</b>                                                                                    |                |       |       |       |
| Icp-1, Icp-2, Icp-3, Icp-4, Icp-5, Yox-6, Yox-7, Yox-8, Yox-9, Yox-10, Rox-1, Rox-2, Rox-3, Rox-4, Rox-5 |                | 86.7% | 0.0%  | 0.0%  |
| Icp-6, Icp-7, Icp-8, Icp-9, Icp-10, Yox-1, Yox-2, Yox-3, Yox-4, Yox-5,                                   |                | 97.8% | 0.0%  | 0.0%  |

|                                                                                                           |  |       |       |       |
|-----------------------------------------------------------------------------------------------------------|--|-------|-------|-------|
| Rox-6, Rox-7, Rox-8, Rox-9, Rox-10                                                                        |  |       |       |       |
| <b>NMDS - Euclidean</b>                                                                                   |  |       |       |       |
| Icp-1, Icp-2, Icp-3, Icp-4, Icp-5, Yox-6, Yox-7, Yox-8, Yox-9, Yox-10, Rox-1, Rox-2, Rox-3, Rox-4, Rox-5  |  | 91.1% | 0.0%  | 0.0%  |
| Icp-6, Icp-7, Icp-8, Icp-9, Icp-10, Yox-1, Yox-2, Yox-3, Yox-4, Yox-5, Rox-6, Rox-7, Rox-8, Rox-9, Rox-10 |  | 93.3% | 0.0%  | 0,0%  |
| <b>Cluster UPGMA - K-means</b>                                                                            |  |       |       |       |
| Icp-1, Icp-2, Icp-3, Icp-4, Icp-5, Yox-6, Yox-7, Yox-8, Yox-9, Yox-10, Rox-1, Rox-2, Rox-3, Rox-4, Rox-5  |  | 86.7% | 64.4% | 62.2% |
| Icp-6, Icp-7, Icp-8, Icp-9, Icp-10, Yox-1, Yox-2, Yox-3, Yox-4, Yox-5, Rox-6, Rox-7, Rox-8, Rox-9, Rox-10 |  | 91.1% | 73.3% | 84.4% |
| <b>Inceptisol (Icp)</b>                                                                                   |  |       |       |       |
| <b>PCA - variance</b>                                                                                     |  |       |       |       |
| Icp-4, Icp-6                                                                                              |  | 100%  | 66.7% | 66.7% |
| Icp-2, Icp-5                                                                                              |  | 100%  | 83.3% | 83.3% |
| Icp-3, Icp-8                                                                                              |  | 100%  | 100%  | 100%  |
| Icp-7, Icp-10                                                                                             |  | 100%  | 100%  | 100%  |
| Icp-1, Icp-9                                                                                              |  | 100%  | 83.3% | 83.3% |
| Icp-1, Icp-5, Icp-7                                                                                       |  | 100%  | 33.3% | 33.3% |
| Icp-2, Icp-8, Icp-10                                                                                      |  | 100%  | 100%  | 100%  |
| Icp-3, Icp-6, Icp-9                                                                                       |  | 100%  | 77.8% | 77.8% |
| Icp-1, Icp-2, Icp-6, Icp-7                                                                                |  | 100%  | 83.3% | 91.7% |
| Icp-4, Icp-8, Icp-9, Icp-10                                                                               |  | 83.3% | 25.0% | 25.0% |
| Icp-2, Icp-3, Icp-4, Icp-8, Icp-9                                                                         |  | 91.7% | 41.7% | 16.7% |
| Icp1, Icp-5, Icp-6, Icp-7, Icp-10                                                                         |  | 100%  | 41.7% | 41.7% |
| All Icp samples                                                                                           |  | 83.3% | 10.0% | 10.0% |
| <b>NMDS - Euclidean</b>                                                                                   |  |       |       |       |
| Icp-4, Icp-6                                                                                              |  | 100%  | 66.7% | 66.7% |
| Icp-2, Icp-5                                                                                              |  | 100%  | 83.3% | 83.3% |
| Icp-3, Icp-8                                                                                              |  | 100%  | 100%  | 100%  |
| Icp-7, Icp-10                                                                                             |  | 100%  | 100%  | 100%  |
| Icp-1, Icp-9                                                                                              |  | 100%  | 83.3% | 83.3% |
| Icp-1, Icp-5, Icp-7                                                                                       |  | 100%  | 33.3% | 66.7% |
| Icp-2, Ico-8, Icp-10                                                                                      |  | 100%  | 88.9% | 88.9% |
| Icp-3, Icp-6, Icp-9                                                                                       |  | 100%  | 66.7% | 77.8% |
| Icp-1, Icp-2, Icp-6, Icp-7                                                                                |  | 100%  | 83.3% | 91.7% |
| Icp-4, Icp-8, Icp-9, Icp-10                                                                               |  | 83.3% | 25.0% | 25.0% |
| Icp-2, Icp-3, Icp-4, Icp-8, Icp-9                                                                         |  | 100%  | 41.7% | 66.7% |
| Icp1, Icp-5, Icp-6, Icp-7, Icp-10                                                                         |  | 83.3% | 66.7% | 75.0% |
| All Icp samples                                                                                           |  | 86.7% | 6.7%  | 6.7%  |
| <b>Cluster UPGMA - K-means</b>                                                                            |  |       |       |       |
| Icp-4, Icp-6                                                                                              |  | 100%  | 66.7% | 83.3% |

|                                    |  |       |       |       |
|------------------------------------|--|-------|-------|-------|
| Icp-2, Icp-5                       |  | 100%  | 83.3% | 83.3% |
| Icp-3, Icp-8                       |  | 100%  | 100%  | 100%  |
| Icp-7, Icp-10                      |  | 100%  | 100%  | 100%  |
| Icp-1, Icp-9                       |  | 100%  | 83.3% | 83.3% |
| Icp-1, Icp-5, Icp-7                |  | 100%  | 88.9% | 66.7% |
| Icp-2, Ico-8, Icp-10               |  | 100%  | 88.9% | 100%  |
| Icp-3, Icp-6, Icp-9                |  | 100%  | 88.9% | 77.8% |
| Icp-1, Icp-2, Icp-6, Icp-7         |  | 91.7% | 83.3% | 91.7% |
| Icp-4, Icp-8, Icp-9, Icp-10        |  | 91.7% | 83.3% | 58.3% |
| Icp-2, Icp-3, Icp-4, Icp-8, Icp-9  |  | 100%  | 66.7% | 58.3% |
| Icp1, Icp-5, Icp-6, Icp-7, Icp-10  |  | 75%   | 58.3% | 66.7% |
| All Icp samples                    |  | 80.0% | 60.0% | 70.0% |
| <b>Reddish Oxisol (Rox)</b>        |  |       |       |       |
| <b>PCA - variance</b>              |  |       |       |       |
| Rox-2, Rox-10                      |  | 66.7% | 66.7% | 66.7% |
| Rox-1, Rox-6                       |  | 66.7% | 66.7% | 66.7% |
| Rox-4, Rox-8                       |  | 33.3% | 50.0% | 33.3% |
| Rox-5, Rox-7                       |  | 33.3% | 33.3% | 33.3% |
| Rox-3, Rox-9                       |  | 66.7% | 50.0% | 50.0% |
| Rox-4, Rox-5, Rox-7                |  | 77.8% | 66.7% | 100%  |
| Rox-1, Rox-3, Rox-10               |  | 88.9% | 66.7% | 33.3% |
| Rox-2, Rox-6, Rox-9                |  | 100%  | 100%  | 100%  |
| Rox-3, Rox-5, Rox-6, Rox-7         |  | 58.3% | 0.0%  | 0.0%  |
| Rox-1, Rox-2, Rox-4, Rox-9         |  | 88.9% | 41.7% | 66.7% |
| Rox-4, Rox-6, Rox-7, Rox-8, Rox-10 |  | 33.3% | 53.3% | 60.0% |
| Rox-1, Rox-2, Rox-3, Rox-5, Rox-9  |  | 60.0% | 0.0%  | 0.0%  |
| All Rox samples                    |  | 30.0% | 0.0%  | 0.0%  |
| <b>NMDS - Euclidean</b>            |  |       |       |       |
| Rox-2, Rox-10                      |  | 66.7% | 66.7% | 66.7% |
| Rox-1, Rox-6                       |  | 66.7% | 66.7% | 33.3% |
| Rox-4, Rox-8                       |  | 33.3% | 50.0% | 33.3% |
| Rox-5, Rox-7                       |  | 33.3% | 0.0%  | 33.3% |
| Rox-3, Rox-9                       |  | 83.3% | 50.0% | 50.0% |
| Rox-4, Rox-5, Rox-7                |  | 66.7% | 66.7% | 100%  |
| Rox-1, Rox-3, Rox-10               |  | 88.9% | 33.3% | 22.2% |
| Rox-2, Rox-6, Rox-9                |  | 100%  | 88.9% | 88.9% |
| Rox-3, Rox-5, Rox-6, Rox-7         |  | 16.7% | 0.0%  | 25.0% |
| Rox-1, Rox-2, Rox-4, Rox-9         |  | 88.9% | 75.0% | 66.7% |
| Rox-4, Rox-6, Rox-7, Rox-8, Rox-10 |  | 40.0% | 40.0% | 73.3% |
| Rox-1, Rox-2, Rox-3, Rox-5, Rox-9  |  | 60.0% | 0.0%  | 0.0%  |
| All Rox samples                    |  | 33.3% | 0.0%  | 0.0%  |
| <b>Cluster UPGMA - K-means</b>     |  |       |       |       |
| Rox-2, Rox-10                      |  | 100%  | 100%  | 100%  |
| Rox-1, Rox-6                       |  | 100%  | 83.3% | 83.3% |
| Rox-4, Rox-8                       |  | 100%  | 100%  | 100%  |
| Rox-5, Rox-7                       |  | 100%  | 100%  | 100%  |
| Rox-3, Rox-9                       |  | 100%  | 83.3% | 83.3% |
| Rox-4, Rox-5, Rox-7                |  | 100%  | 88.9% | 33.3% |



|                                    |                 |       |       |       |
|------------------------------------|-----------------|-------|-------|-------|
| Rox-1, Rox-3, Rox-10               |                 | 100%  | 66.7% | 66.7% |
| Rox-2, Rox-6, Rox-9                |                 | 100%  | 88.9% | 66.7% |
| Rox-3, Rox-5, Rox-6, Rox-7         |                 | 83.3% | 25.0% | 25.0% |
| Rox-1, Rox-2, Rox-4, Rox-9         |                 | 58.3% | 83.3% | 83.3% |
| Rox-4, Rox-6, Rox-7, Rox-8, Rox-10 |                 | 93.3% | 73.3% | 86.7% |
| Rox-1, Rox-2, Rox-3, Rox-5, Rox-9  |                 | 86.7% | 40.0% | 73.3% |
| All Rox samples                    |                 | 80.0% | 70.0% | 83.3% |
| <b>Yelowish Oxisol (Yox)</b>       |                 |       |       |       |
| <b>PCA - variance</b>              |                 |       |       |       |
| Yox-5, Yox-7                       | Yox-5c          | 83.3% | 83.3% | 83.3% |
| Yox-1, Yox-3                       | Yox-3c          | 83.3% | 0.0%  | 83.3% |
| Yox-4, Yox-6                       | Yox-4c, Yox-6a  | 66.7% | 66.7% | 66.7% |
| Yox-2, Yox-9                       | Yox-2c, Yox-9c  | 66.7% | 0.0%  | 66.7% |
| Yox-8, Yox-10                      | Yox-8b, Yox-10c | 66.7% | 33.3% | 83.3% |
| Yox-2, Yox-3, Yox-9                |                 | 100%  | 55.6% | 55.6% |
| Yox-5, Yox-7, Yox-10               | Yox-5c          | 88.9% | 77.8% | 55.6% |
| Yox-1, Yox-4, Yox-6                |                 | 100%  | 66.7% | 100%  |
| Yox-1, Yox-3, Yox-4, Yox-10        |                 | 100%  | 0.0%  | 0.0%  |
| Yox-2, Yox-5, Yox-6, Yox-7         |                 | 33.3% | 16.7% | 16.7% |
| Yox-4, Yox-5, Yox-6, Yox-7, Yox-10 |                 | 86.7% | 26.7% | 40.0% |
| Yox-1, Yox-2, Yox-3, Yox-8, Yox-9  |                 | 93.3% | 13.3% | 0.0%  |
| All Yox samples                    |                 | 56.7% | 20.0% | 16.7% |
| <b>NMDS - Euclidean</b>            |                 |       |       |       |
| Yox-5, Yox-7                       | Yox-5c          | 83.3% | 83.3% | 83.3% |
| Yox-1, Yox-3                       | Yox-3c          | 83.3% | 0.0%  | 83.3% |
| Yox-4, Yox-6                       | Yox-4c, Yox-6a  | 66.7% | 66.7% | 66.7% |
| Yox-2, Yox-9                       | Yox-9c          | 83.3% | 0.0%  | 0.0%  |
| Yox-8, Yox-10                      | Yox-8a, Yox-10c | 66.7% | 0.0%  | 33.3% |
| Yox-2, Yox-3, Yox-9                |                 | 66.7% | 33.3% | 55.6% |
| Yox-5, Yox-7, Yox-10               | Yox-5c          | 88.9% | 77.8% | 55.6% |
| Yox-1, Yox-4, Yox-6                |                 | 100%  | 55.6% | 66.7% |
| Yox-1, Yox-3, Yox-4, Yox-10        |                 | 100%  | 91.7% | 91.7% |
| Yox-2, Yox-5, Yox-6, Yox-7,        |                 | 41.7% | 16.7% | 16.7% |
| Yox-4, Yox-5, Yox-6, Yox-7, Yox-10 |                 | 86.7% | 46.7% | 26.7% |
| Yox-1, Yox-2, Yox-3, Yox-8, Yox-9  |                 | 86.7% | 20.0% | 73.3% |
| All Yox samples                    |                 | 60.0% | 20.0% | 16.7% |
| <b>Cluster UPGMA - K-means</b>     |                 |       |       |       |
| Yox-5, Yox-7                       | Yox-5c          | 83.3% | 100%  | 100%  |
| Yox-1, Yox-3                       |                 | 100%  | 100%  | 100%  |
| Yox-4, Yox-6                       |                 | 100%  | 100%  | 100%  |
| Yox-2, Yox-9                       |                 | 100%  | 100%  | 83.3% |
| Yox-8, Yox-10                      |                 | 100%  | 100%  | 83.3% |
| Yox-2, Yox-3, Yox-9                |                 | 100%  | 88.9% | 55.6% |

|                                       |  |       |       |       |
|---------------------------------------|--|-------|-------|-------|
| Yox-5, Yox-7, Yox-10                  |  | 88.9% | 88.9% | 77.8% |
| Yox-1, Yox-4, Yox-6                   |  | 55.6% | 100%  | 100%  |
| Yox-1, Yox-3, Yox-4,<br>Yox-10        |  | 91.7% | 66.7% | 66.7% |
| Yox-2, Yox-5, Yox-6,<br>Yox-7         |  | 91.7% | 66.7% | 66.7% |
| Yox-4, Yox-5, Yox-6,<br>Yox-7, Yox-10 |  | 80.0% | 60.0% | 60.0% |
| Yox-1, Yox-2, Yox-3,<br>Yox-8, Yox-9  |  | 100%  | 73.3% | 60.0% |
| All Yox samples                       |  | 86.7% | 63.3% | 73.3% |
